# Supplementary material
Source: MDPI journal article supplement (https://www.mdpi.com/2571-6255/5/4/106)
Supplement: s1 [file s1 › fire-1810303-supplementary.pdf]

Supplementary data

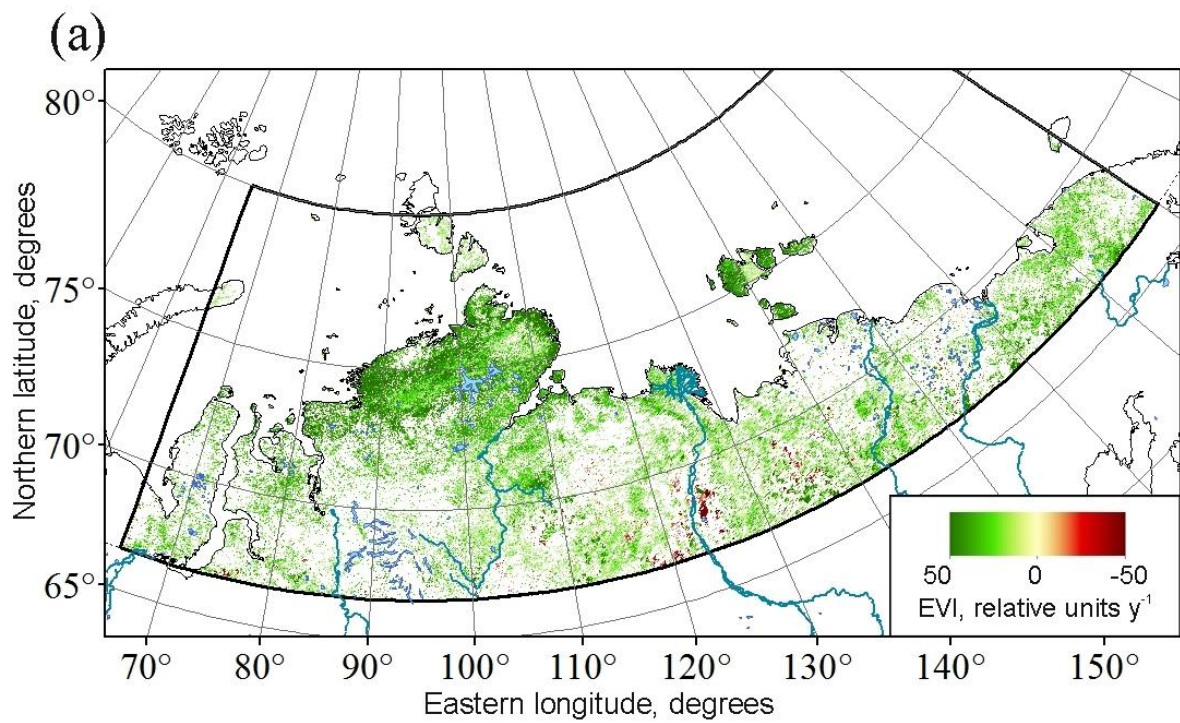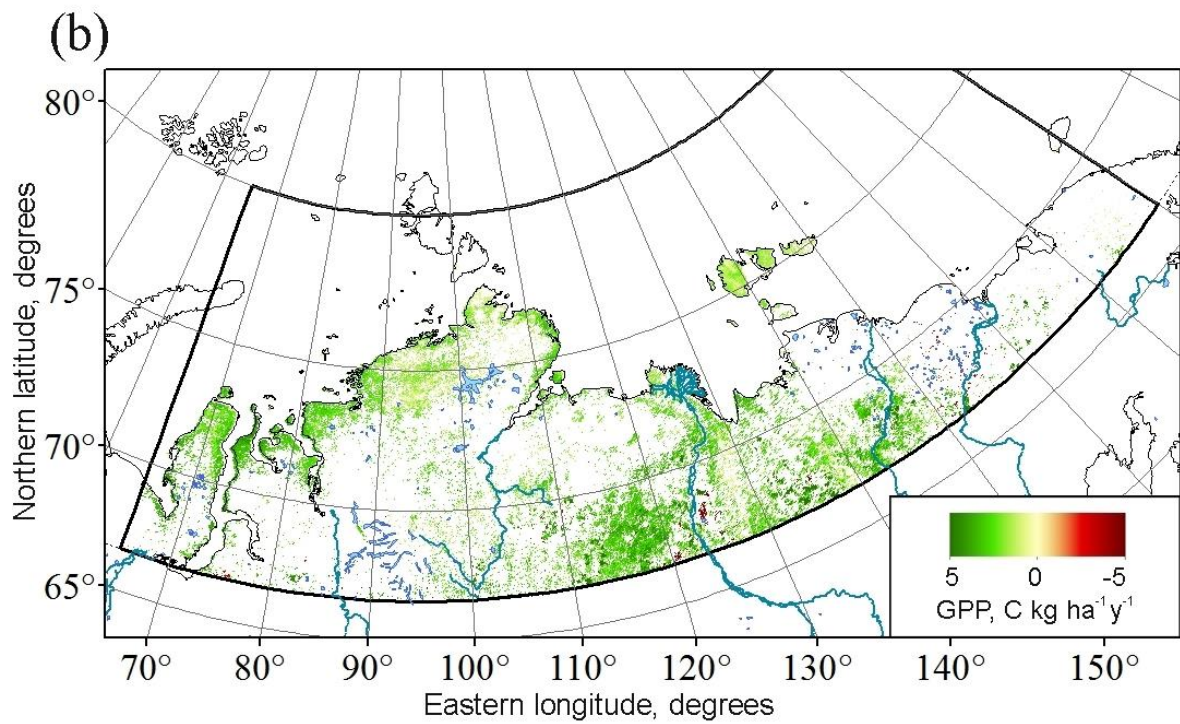

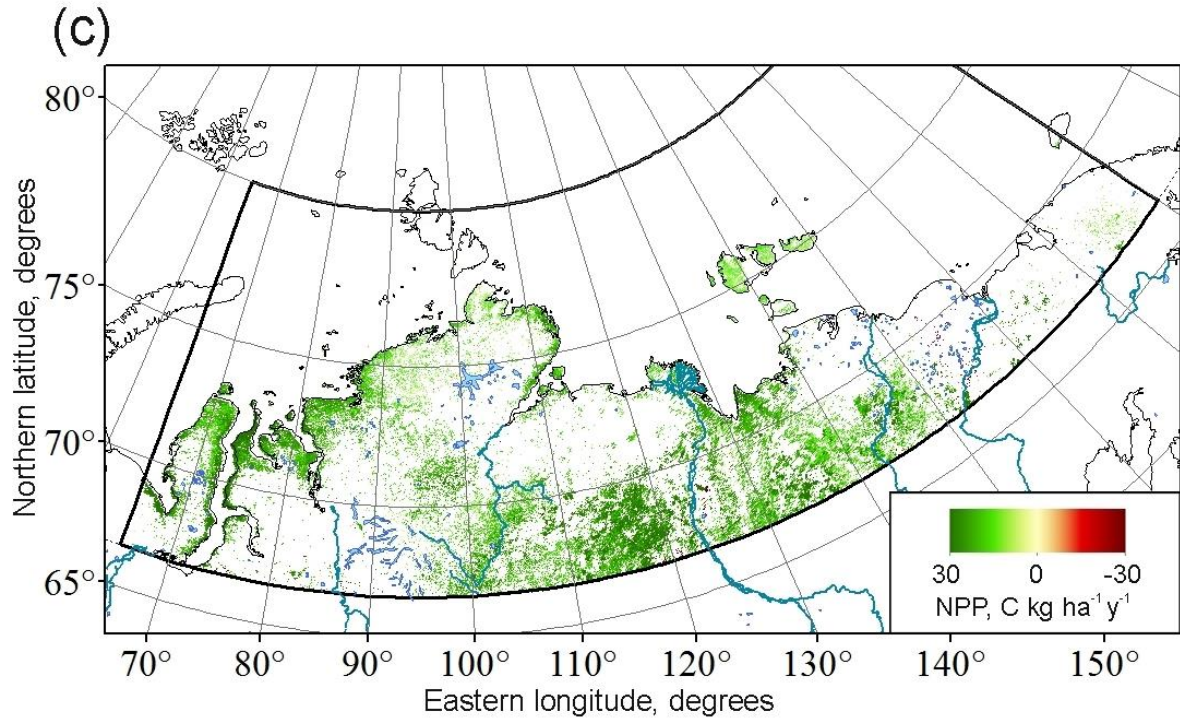

**Figure S1.** Trends in productivity of the Siberian Arctic. (a) Enhanced vegetation index, EVI. (b) Gross primary productivity, GPP. (c) Net primary productivity, NPP. Positive trends observed for 36% (EVI), 22% (GPP) and 22% (NPP) of the territory. Negative trends observed on the 1.3%, 0.4%, and 0.3%, of the territory, respectively. Trends significant at  $P < 0.05$ .
